# Supplementary material
Source: publisher figshare collection journal article supplement (https://acs.figshare.com/ndownloader/files/3773416)
Supplement: Supplementary file 1 [file 3773416]

## Supporting Information

Thermal cycling behavior of zinc antimonide thin films for high temperature thermoelectric power generation applications

*Hyung Cheoul Shim\*, Chang-Su Woo, Seungwoo Han\**

Department of Nano-Mechanics, Korea Institute of Machinery & Materials (KIMM), 305-343, 156, Gajeongbuk-Ro, Yuseong-Gu, Daejeon, Republic of Korea

E-mail: scafos@kimm.re.kr, swhan@kimm.re.kr

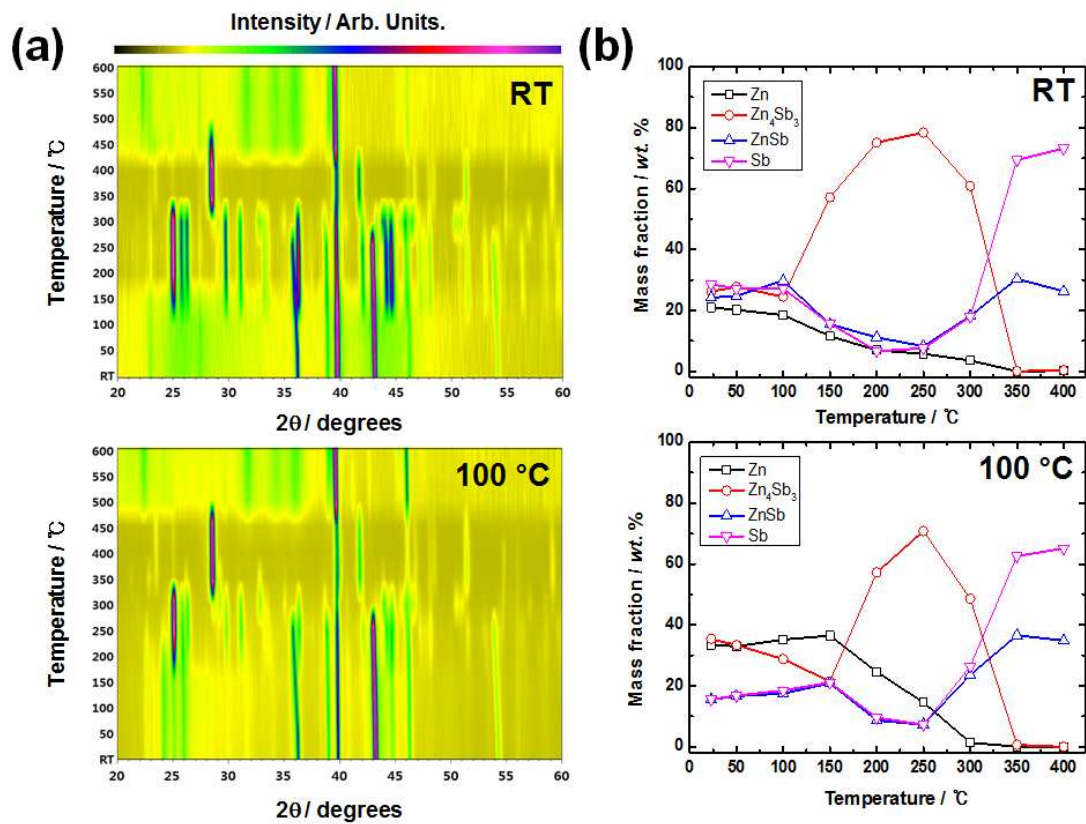

**Figure S1.** (a) *In-situ* high temperature XRD data after annealing of *type A* (RT) and *type B* (100 °C) samples. (b) Quantitative analysis from XRD data is shown in Figure S1a.

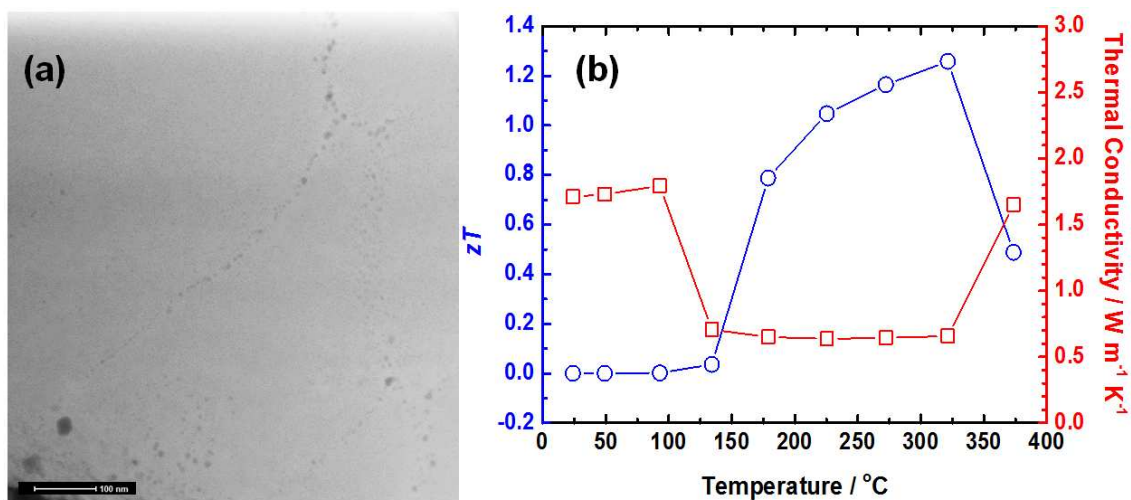

**Figure S2.** (a) STEM image of *type A* sample after 10 thermal cycles. The nano voids are generated along the grain boundaries. (b) Thermoelectric figure of merit,  $zT$  and thermal conductivity of *type A* sample as a function of temperature.

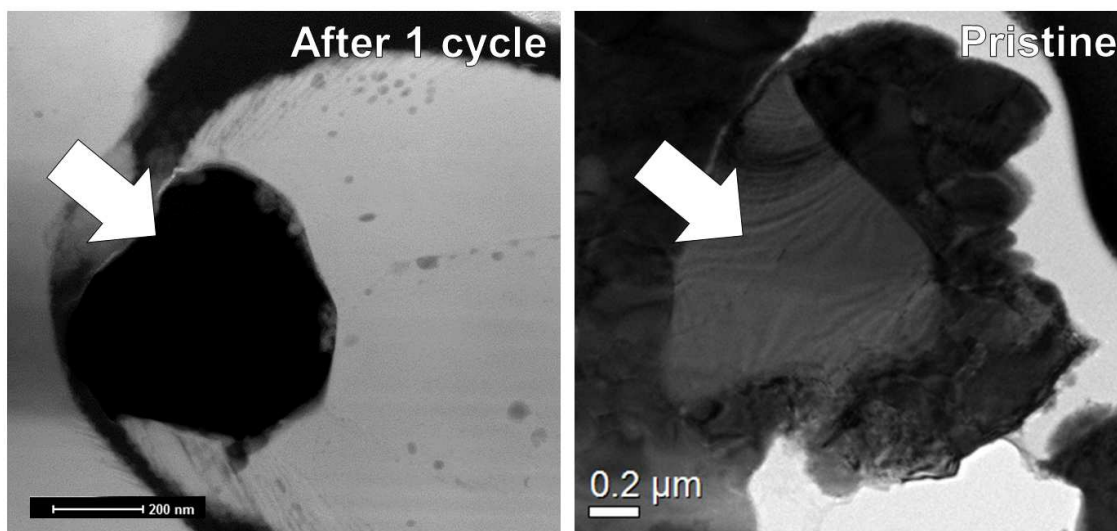

**Figure S3.** STEM and TEM images of a *type A* thin film after the first thermal cycle (left), and a pristine sample (right), respectively. The white arrow shows the position of Zn in a Zn-rich  $\text{Zn}_4\text{Sb}_3$  particle.

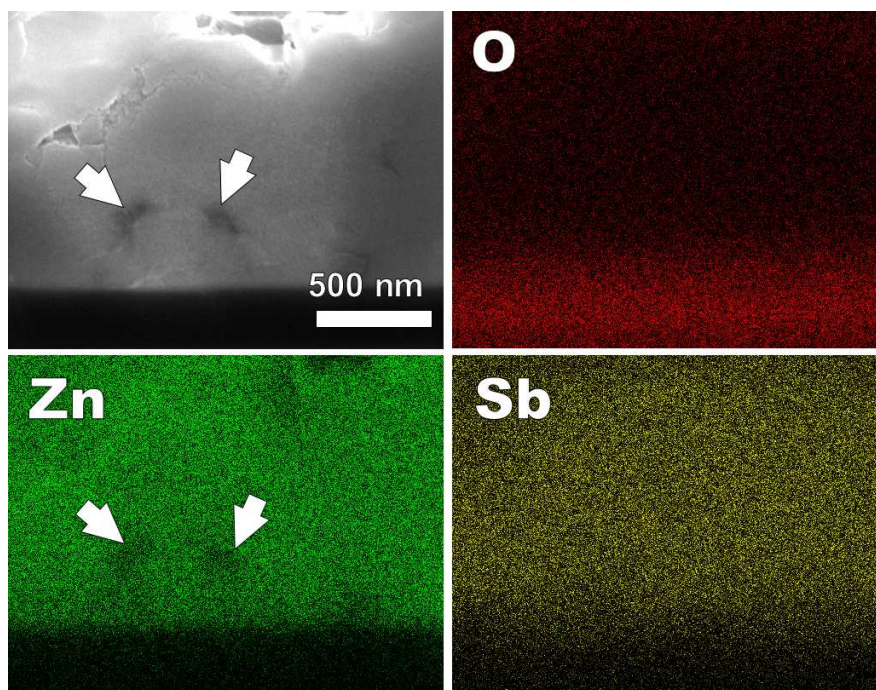

**Figure S4.** The SEM-EDS elemental mapping results of *type A* sample after 10 thermal cycles in  $N_2$ . The white arrow shows the identical position of dark marks between FESEM image and EDS mapping results of Zn.

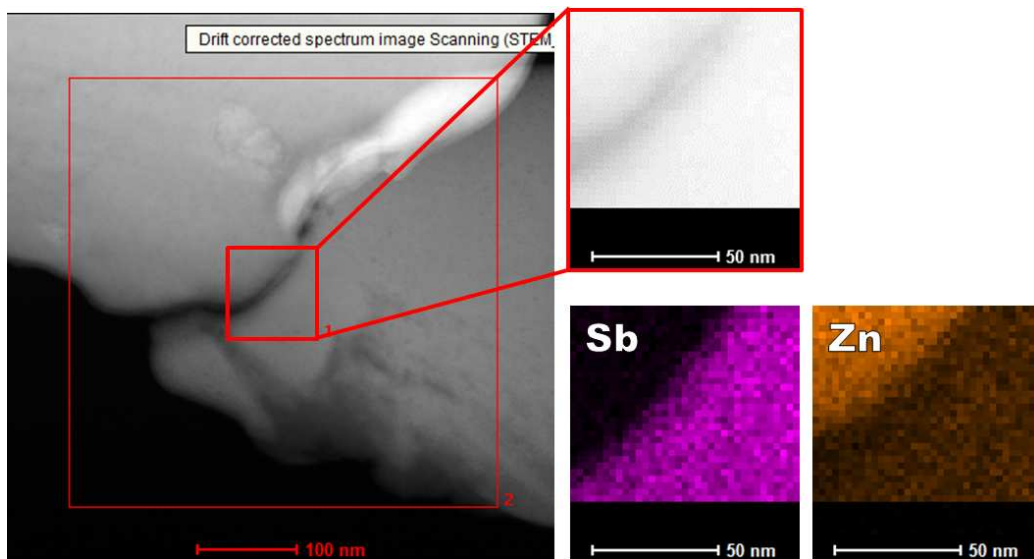

**Figure S5.** The STEM-EDS elemental mapping results of  $\text{Zn}_x\text{Sb}_y$  thin film after 10 thermal cycles in air.

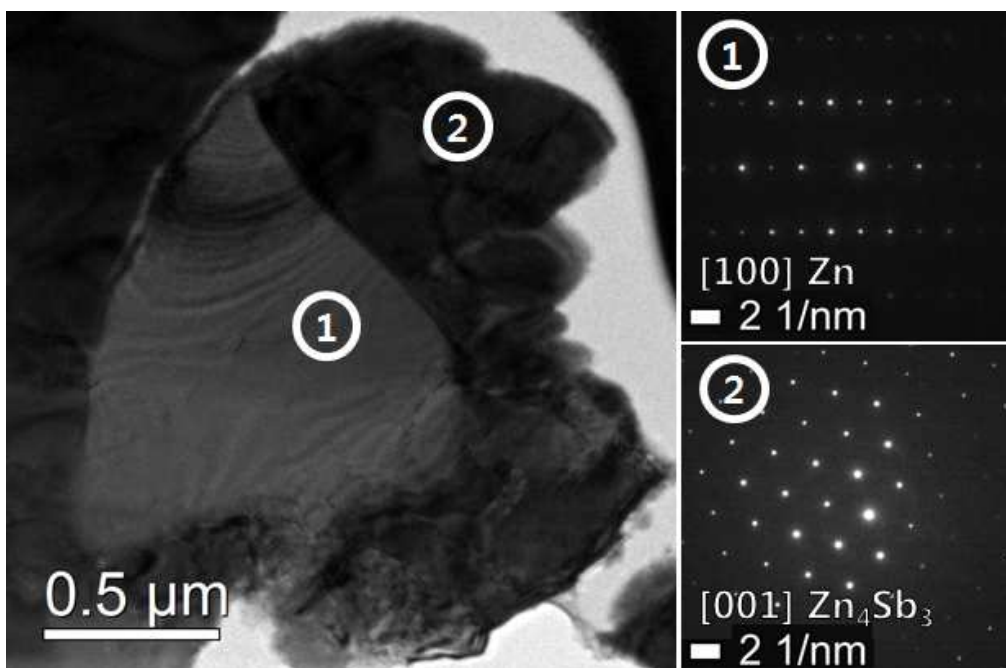

**Figure S6.** The SAD pattern results of  $\text{Zn}_x\text{Sb}_y$  thin film after 10 thermal cycles in air.

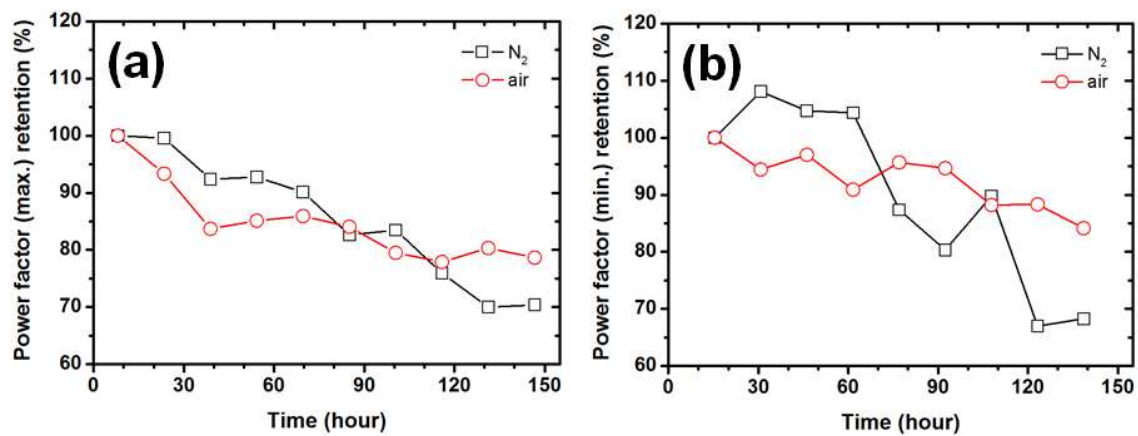

**Figure S7.** The maximum (a) and minimum (b) value of power factor retention during thermal cycling. The max. and min. value was extracted from the P.F. value as shown in Figure 3(c).
